# Supplementary material for: We learned we can do something to reduce bullying: Children designing anti-bullying mobile apps to empower their peers
Source: Frontiers journal article supplement (doi:10.3389/feduc.2023.1112835), 2023-03-23
Supplement: Data_Sheet_1.doc [file Data_Sheet_1.doc]

# Supplementary material - Student starting and ending survey questions

Student starting survey questions

| **No** | **Question** | **Answer type** |
| --- | --- | --- |
| **Background and consent: All information will be anonymized and the results of this survey are only seen by the research group** | | |
| 1 | Name | Open ended |
| 2 | Class | Open ended |
| 3 | Choose your age | Multiple choice [11, 12, 13, 14, 15] |
| 4 | Did you give your consent on the research consent form and your permission to use the material for research purpose? | Multiple choice [Yes, No] |
| 5 | What hobbies do you have? | Open ended |
| 6 | What are your top 3 favourite school subjects? | Open ended |
| **Bullying and critical thinking: In this project, we try to find solutions for preventing bullying in schools and how to make the school atmosphere comfortable for everyone. Answer first these questions regarding school bullying.** | | |
| 7 | What could you do yourself to prevent bullying in your school? Have you done something regarding this? | Open ended |
| 8 | What could be done in general so that the school atmosphere would be nice for everyone? | Open ended |
| 9 | How could digital technology be used to prevent bullying and make the school atmosphere nice? | Open ended |
| 10 | Have you ever ideated, designed or developed (technological) solutions to prevent bullying and/or making the school atmosphere nice? | Open ended |
| **Technology use: Answer these questions about your technology use according to your own experiences. There are no correct answers to these questions.** | | |
| 11 | What does the word digital technology mean to you? | Open ended |
| 12 | Describe what is an application or an app? Mention some apps. | Open ended |
| 13 | Which devices do you use? | Multiple choice [Phone, Computer/Laptop, Tablet, Game Console, Other, what?] |
| *For any options chosen in 13, the question 14 opens regarding it* | | |
| 14 | What do you do with it? | Open ended |
| 15 | Where or from whom you have learned how to use digital technology? | Open ended |
| 16 | Who do you use digital technology with? | Open ended |
| 17 | What you like about digital technology? What don’t you like about it? | Open ended |
| 18 | I’m capable in using digital technology. | 5-point scale [Strongly agree, somewhat agree, neither agree or disagree, somewhat disagree, strongly disagree] |
| 19 | I like using digital technology. | 5-point scale [Strongly agree, somewhat agree, neither agree or disagree, somewhat disagree, strongly disagree] |
| 20 | I want to use digital technology. | 5-point scale [Strongly agree, somewhat agree, neither agree or disagree, somewhat disagree, strongly disagree] |
| 21 | How does digital technology affect our lives? | Open ended |
| 22 | What positive aspects does digital technology have? Can you do good with digital technology, what is good about it? Has it ever made you happy? | Open ended |
| 23 | What negative aspects does digital technology have? Can you do bad with digital technology, what is bad about it? Has it ever made you sad or angry? | Open ended |
| 24 | Who is responsible for developing digital technology? Why is digital technology the way it is? | Open ended |
| 25 | Can you influence digital technology yourself? How should you be able to influence it? | Open ended |
| 26 | Are you interested in studying digital technology and working in a place where they design, develop and/or build digital technology? | 5-point scale [Yes, somewhat yes, neither yes or no, somewhat no, no] |
| **Ideation, designing, making: Choose the things you do on your freetime or otherwise regularly and answer to the additional questions regarding the activities you chose.** | | |
| 27 | Select the things you do on your free time | Multiple choice [Drawing, Arts and crafts, Handicraft, Make clothes, Repair things, Build things (Toys, devices, huts...), Build with LEGO bricks, None of the above. ] |
| *For any activity chosen in 27, the following questions [28-31] open regarding it* | | |
| 28 | What things do you do / draw? | Open ended |
| 29 | Are you good at it? | 5-point scale [Yes, somewhat yes, neither yes or no, somewhat no, no] |
| 30 | Do you like doing it? | 5-point scale [Yes, somewhat yes, neither yes or no, somewhat no, no] |
| 31 | Do you want to do it? | 5-point scale [Yes, somewhat yes, neither yes or no, somewhat no, no] |
| **Technology design: Answer these questions according to your own experiences.** | | |
| 32 | Are you creative and/or innovative? Do you have a good imagination? | 5-point scale [Yes, somewhat yes, neither yes or no, somewhat no, no] |
| 33 | Where can you get ideas? | Multiple choice [Friends, Family, Internet Apps, Other, what?] |
| 34 | Do you express yourself with digital technology? What content have you made with digital technology? (Videos, pictures, music, games...) | Open ended |
| 35 | Are you interested in how digital technology works? Have you examined any devices? Have you searched information about digital technology and devices online? | Open ended |
| 36 | Do you know how to fix digital technology? Have you searched information about fixing devices or some errors online? | Open ended |
| 37 | Have you designed or ideated new digital technology? | Multiple choice [yes, maybe, no] |
| *If option yes is chosen in 37, questions 38-43 open* | | |
| 38 | What do you usually do? | Open ended |
| 39 | Where do you usually do it? | Open ended |
| 40 | Where do you usually do it? | Open ended |
| 41 | Are you good at it? | 5-point scale [Yes, somewhat yes, neither yes or no, somewhat no, no] |
| 42 | Do you like doing it? | 5-point scale [Yes, somewhat yes, neither yes or no, somewhat no, no] |
| 43 | Do you want to do it? | 5-point scale [Yes, somewhat yes, neither yes or no, somewhat no, no] |
| **Technology making: Answer these questions according to your own experiences.** | | |
| 44 | Does someone in your family or close circle work/visit regularly in a FabLab? | Multiple choice [Yes, Maybe, No] |
| 45 | Do you know what can be done in a FabLab? Give examples. | Open ended |
| 46 | Have you been to a Fablab? | Multiple choice [Yes, Maybe, No] |
| *If option yes is chosen in 46, questions 47-51 open* | | |
| 47 | What FabLab have you visited and when? | Open ended |
| 48 | What did you do at the FabLab? | Open ended |
| 49 | Are you good at the things you can do in a FabLab? | 5-point scale [Yes, somewhat yes, neither yes or no, somewhat no, no] |
| 50 | Do you like/did you like going to a FabLab? | 5-point scale [Yes, somewhat yes, neither yes or no, somewhat no, no] |
| 51 | Do you want to go again to a FabLab? | 5-point scale [Yes, somewhat yes, neither yes or no, somewhat no, no] |
| 52 | Does someone in your family or close circle do 3D printing, lasercutting, electronics, leds or Arduino things? | Multiple choice [Yes, Maybe, No] |
| 53 | Have you tried 3D printing, lasercutting, electronics, leds or Arduino? Choose the ones you have tried. | Multiple choice [3D printing, Laser cutting, Electronics, Leds, Arduino, None of the above] |
| *If an option is chosen in 53, questions 54-57 open* | | |
| 54 | What 3D printing, lasercutting, electronics, leds or Arduino things have you done? When and where? | Open ended |
| 55 | 3D printing, lasercutting, electronics, leds and/or Arduino:  Are you good at it? | 5-point scale [Yes, somewhat yes, neither yes or no, somewhat no, no] |
| 56 | Do you like it? | 5-point scale [Yes, somewhat yes, neither yes or no, somewhat no, no] |
| 57 | Do you want to do it? | 5-point scale [Yes, somewhat yes, neither yes or no, somewhat no, no] |
| 59 | Does someone in your family or close circle work with or use robots? Have you build, used and/or played with robots? | Multiple choice [Yes, Maybe, No] |
| 60 | Have you built or played with robots? | Multiple choice [Yes, Maybe, No] |
| *If option yes is chosen in 60, corresponding questions 62-64 open* | | |
| 61 | What have you done with robots? Where and when? | Open ended |
| 62 | Are you good at it? | 5-point scale [Yes, somewhat yes, neither yes or no, somewhat no, no] |
| 63 | Do you like it? | 5-point scale [Yes, somewhat yes, neither yes or no, somewhat no, no] |
| 64 | Do you want to do it? | 5-point scale [Yes, somewhat yes, neither yes or no, somewhat no, no] |
| 65 | Does someone in your family or close circle know how to program? | Multiple choice [Yes, Maybe, No] |
| 66 | Have you done programming? | Multiple choice [Yes, Maybe, No] |
| *If option yes is chosen in 66, corresponding questions 67-70 open* | | |
| 67 | What have you programmed? Where and when? | Open ended |
| 68 | Are you good at it? | 5-point scale [Yes, somewhat yes, neither yes or no, somewhat no, no] |
| 69 | Do you like it? | 5-point scale [Yes, somewhat yes, neither yes or no, somewhat no, no] |
| 70 | Do you want to do it? | 5-point scale [Yes, somewhat yes, neither yes or no, somewhat no, no] |

Student ending survey questions

| **No** | **Question** | **Answer type** |
| --- | --- | --- |
| 1 | What did you learn about bullying, or how did your thinking change about bullying during the project? | Open ended |
| 2 | Did something change in the class atmosphere related to bullying during the project? | Open ended |
| 3 | Describe in your own words the anti-bullying app your group designed. | Open ended |
| 4 | How happy are you with your group’s idea and prototype? | 5-point scale [Very happy, Happy, Neutral, Unhappy, Very unhappy] |
| 5 | Why do you feel this way? | Open ended |
| 6 | What did you learn about app ideation and prototyping during the project? | Open ended |
| 7 | Describe in your own words the anti-bullying campaign you designed with your group. | Open ended |
| 8 | How happy are you with the group’s anti-bullying campaign? | 5-point scale [Very happy, Happy, Neutral, Unhappy, Very unhappy] |
| 9 | Why do you feel this way about the campaign? (optional) | Open ended |
| 10 | What did you learn about activism during the project? | Open ended |
| 11 | What did you learn about digital fabrication or making during the Fablab visit? | Open ended |
| 12 | The aim of the project was to develop solutions for how to prevent bullying in schools! We wanted to empower the vulnerable: those who are bullied, but also to help those who bully and those who watch from the sidelines. It was also intended to look at bullying critically. How did your CLASS succeed in this? | 5-point scale [Very well, Well, Moderately, Poorly, Very poorly] |
| 13 | How did your GROUP succeed in this? | 5-point scale [Very well, Well, Moderately, Poorly, Very poorly] |
| 14 | Why do you feel this way about your class or group success in the project? (optional) | Open ended |
| 15 | Include here any positive or negative feedback about the project for the researchers. All comments are welcome as they help us to improve the project. | Open ended |
| 16 | Your name | Open ended |
| 17 | Your class | Open ended |
